# Supplementary material
Source: PubMed Central journal article supplement (PMC6052228)
Supplement: supp_AC118.003325_137246_1_supp_130261_p8270y.pdf [file supp_AC118.003325_137246_1_supp_130261_p8270y.pdf]

**A**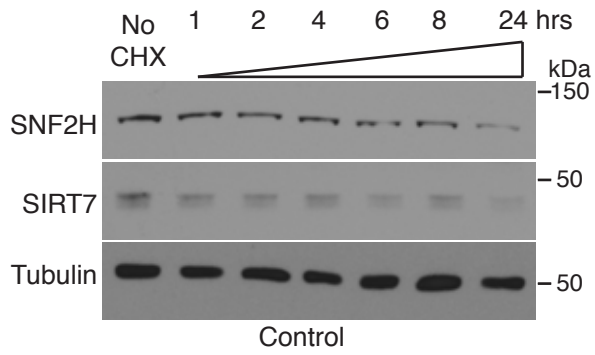**B**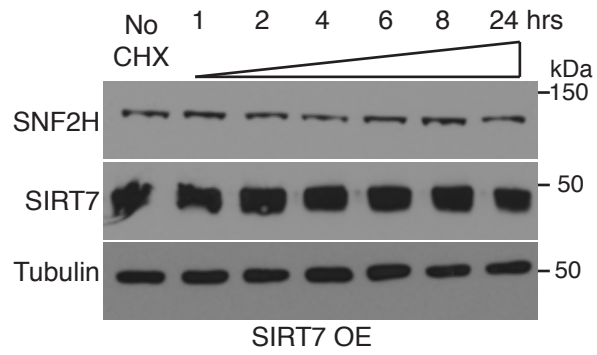

**Supplementary Figure 1.** Western blots of SNF2H protein levels in (a) SIRT7-overexpressing or (b) control cells following treatment with 40ug/ml of cycloheximide, collected at the indicated time points.
