# Supplementary material
Source: PubMed Central journal article supplement (PMC6052228)
Supplement: supp_AC118.003325_Table_Supp.pdf [file supp_AC118.003325_Table_Supp.pdf]

**Table 1: Primers**

| <b>Gene</b>                       | <b>Primer</b> | <b>Sequence</b>          |
|-----------------------------------|---------------|--------------------------|
| <b>CHIP</b>                       |               |                          |
| rDNA promoter (UCE)               | Fw            | ttgggtgaccagagggacc      |
|                                   | Rv            | acacggacacggacacctgtc    |
| rDNA promoter (CPE)               | Fw            | cgtggtcggtgacgcgacct     |
|                                   | Rv            | atataaccggcgcccaaa       |
| 18S                               | Fw            | aattgacggaagggcaccac     |
|                                   | Rv            | tcaatcctgtccgtgtccg      |
| RPS20                             | Fw            | aagttcttcttttgaggaagacg  |
|                                   | Rv            | gaacagcggtgagtcagga      |
| Negative                          | FW            | agcgtcgttacctctctgga     |
|                                   | Rv            | ggcaggcaaagaagtgtctc     |
| <b>ChIP-CHOP</b>                  |               |                          |
| H1                                | Fw            | ctgcgatggtggcgtttttg     |
| H2                                | Rv            | caggtcgccagaggacagc      |
| H3                                | Fw            | ttcgcctccgagtcggcaatttg  |
| P1                                | Fw            | cctccgatcgttgtcagaag     |
| P3                                | Rv            | gcaactcggtcgccgatac      |
| P4                                | Fw            | gtaaaacgacggccagtg       |
| P5                                | Rv            | ggaaacagctatgacctg       |
| <b>Copy number quantification</b> |               |                          |
| 18S                               | Fw            | aattgacggaagggcaccac     |
|                                   | Rv            | tcaatcctgtccgtgtccg      |
| tRNALys                           | Fw            | ccgaatagcttagttgatgaagcg |
|                                   | Rv            | tgtccaatgtggggcttgaac    |
| <b>Promoter methylation</b>       |               |                          |
| rDNA promoter (CPE)               | Fw            | cgtggtcggtgacgcgacct     |
|                                   | Rv            | atataaccggcgcccaaa       |

**Table 2: Antibodies**

| <b>Antibodies</b> | <b>Source</b>                        | <b>Catalog#</b> | <b>Application</b> |
|-------------------|--------------------------------------|-----------------|--------------------|
| SIRT7             | ref Michishita E., Mol Cell Bio 2005 |                 | WB, ChIP, IP       |
| B-Tubulin         | Millipore                            | 05-661          | WB                 |
| SNF2H/SMARCA5     | Novus                                | NB100-55310     | WB, ChIP           |
| Gamma-H2AX        | Abcam                                | ab2893          | ChIP               |
| H2AX              | Abcam                                | ab11175         | WB, ChIP           |
| Rb-IgG            | Abcam                                | ab46540         | ChIP               |
| Gamma-H2AX        | Abcam                                | ab26350         | WB                 |
| Rb-Fibrillarin    | Abcam                                | ab5821          | IF                 |
| Ms-Fibrillarin    | Abcam                                | ab4566          | IF                 |
